# Supplementary material for: Identification of immune-related key genes in the peripheral blood of ischaemic stroke patients using a weighted gene coexpression network analysis and machine learning
Source: J Transl Med. 2022 Aug 12;20:361. doi: 10.1186/s12967-022-03562-w (PMC9373395; doi:10.1186/s12967-022-03562-w)
Supplement: Supplementary file 7 — Additional file 7. Table S6. The key genes identified by the LASSO regression and/or SVM-RFE algorithm. [file 12967_2022_3562_MOESM7_ESM.xls]

## Sheet: Additional Table S6
Names	total	genes
LASSO and SVM-RFE	8	CPQ
		SLC22A4
		ADM
		ANXA3
		CARD6
		UBE2S
		VIM
		ZFP36
LASSO	17	KLF5
		EGR1
		AOC2
		C9orf84
		PFKFB2
		NECAB2
		MGAM
		MIR6732
		PRB3
		EIF4E3
		CECR6
		NSUN7
		TRPM6
		LRRN1
		PGS1
		CCR1
		CITED4
SVM-RFE	32	FCGR1B
		MOSPD2
		IL18RAP
		PLD4
		CTNNB1
		TST
		MAPK13
		ZNF281
		LRG1
		ABCA1
		TM9SF2
		MIR3945HG
		NFIL3
		PMF1
		CR1
		FCAR
		SHKBP1
		VPS9D1
		GK
		CTSK
		SLC2A14
		POM121L9P
		ST6GALNAC3
		STK17B
		SUSD1
		CPD
		PLXDC2
		ACSM2A
		MBOAT2
		F5
		C8orf88
		XRCC2
